# Supplementary material for: Relationship between the degree of recanalization and functional outcome in acute ischemic stroke is mediated by penumbra salvage volume
Source: Springer Nature journal article supplement (doi:10.1007/s00415-021-10410-2), 2021-01-24

SUPPLEMENTAL MATERIAL

**Supplemental Figure 1 - Relationship of the baseline ischemic core volume indicated by ASPECTS and penumbra salvage volume, and its impact on functional outcome at 90 days.**

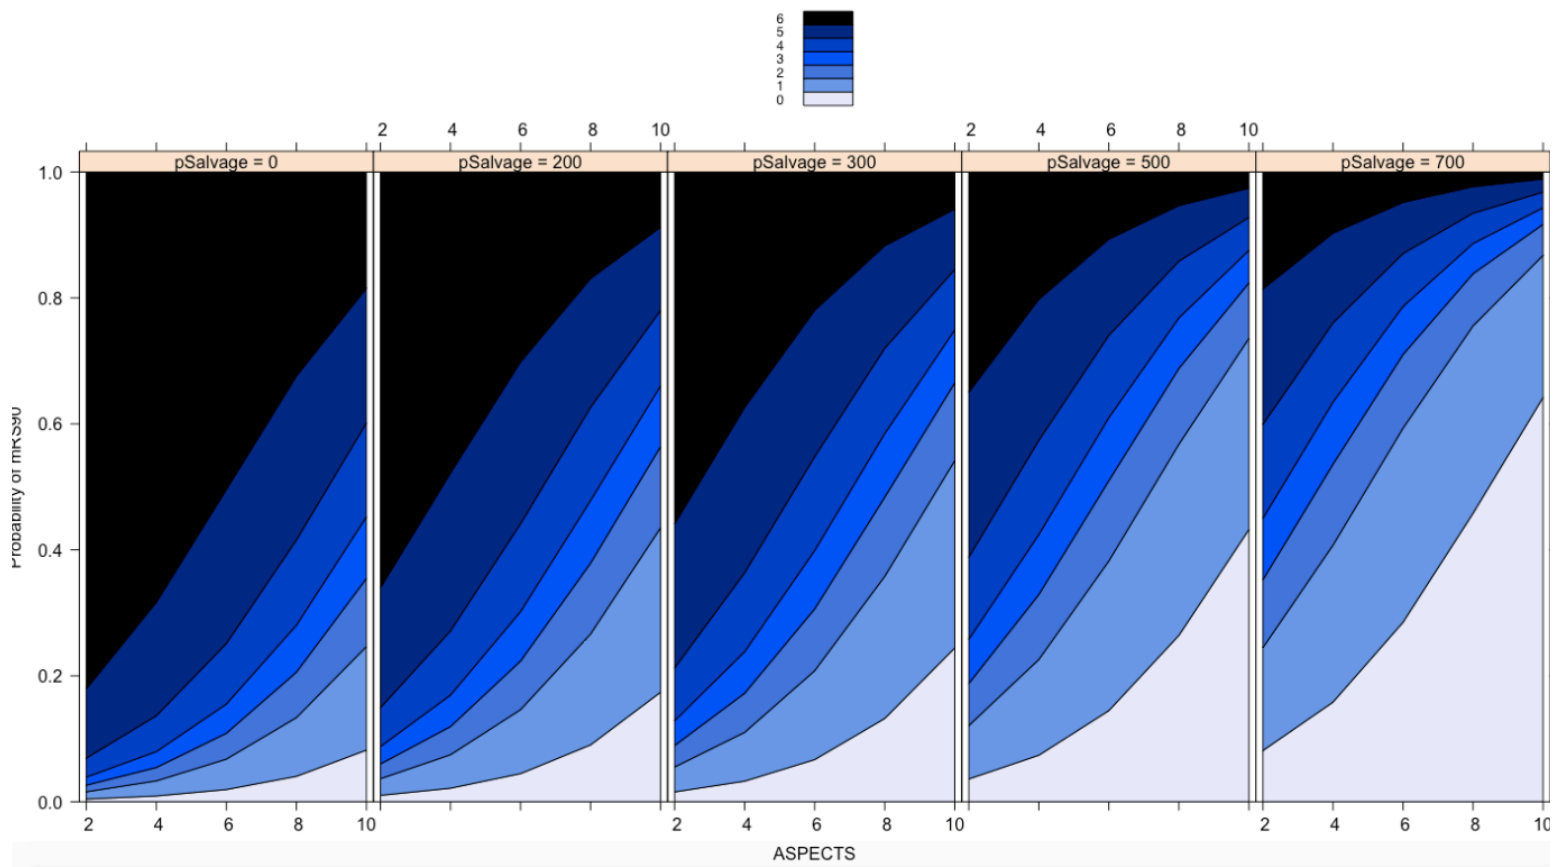

**Supplemental Figure 2 - Relationship of age and penumbra salvage volume, and its impact on functional outcome at 90 days.**

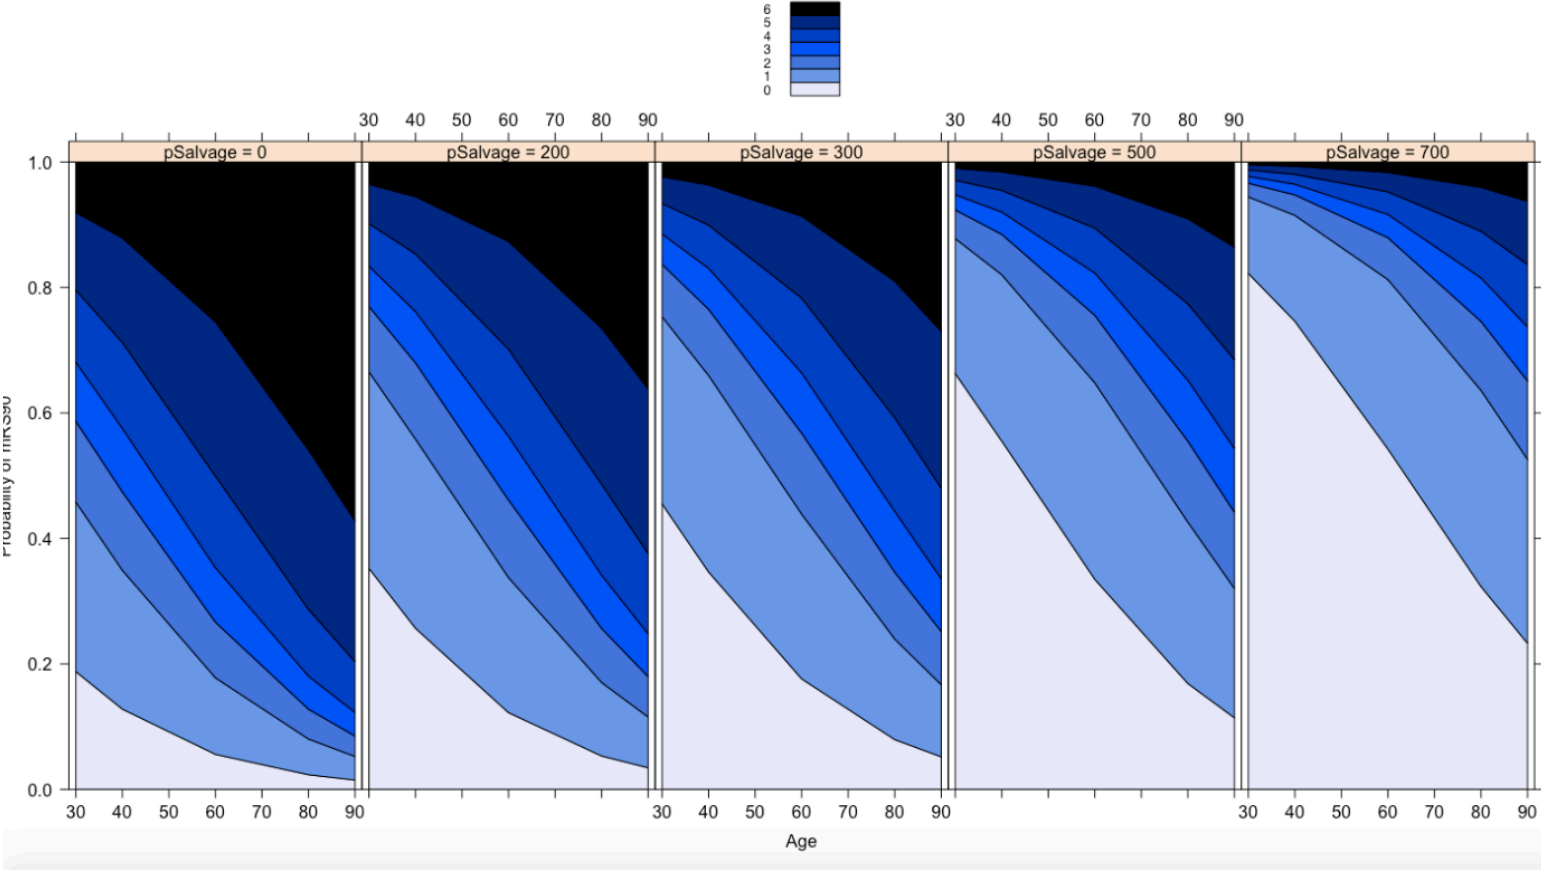

Supplement: MOESM1 [file 18795874]
